# Supplementary material for: Alterations of Gut Microbiota in Patients With Intestinal Tuberculosis That Different From Crohn’s Disease
Source: Front Bioeng Biotechnol. 2021 Jul 6;9:673691. doi: 10.3389/fbioe.2021.673691 (PMC8290844; doi:10.3389/fbioe.2021.673691)
Supplement: Supplementary file 4 [file Table_1.XLSX]

## Sheet: Table S1
Characteristics of enrolled subjects.
	ITB	CD	HC
Number	6	16	4
Age, years, median (min-max)	53(36-67)	42(35-69)	51(40-65)
Gender, Male, n(%)	4(66%)	7(44%)	2(50%)
BMI, kg/m2, median (min-max)	20.7(19.6-23.7)	19.3(17.63-27.18)	21.6(19.3-22.7)
Location (number)
Ileum	4	8	0
Colon	2	5	0
Ileocolon	0	3	0

## Sheet: Table S2
76 genera are uniquely harbored in ITB while 23 genera in HC.
ITB	HC
Actinomycetospora	Abiotrophia
Aeromicrobium	Adlercreutzia
Alteromonas	Anaerostipes
Anaerotruncus	Arsenicicoccus
Arthrospira	Azospirillum
Asticcacaulis	Blastomonas
Azorhizobium	Campylobacter
Bdellovibrio	Capnocytophaga
Brevibacillus	Catonella
Burkholderia	Clavibacter
CandidatusAquiluna	Coprobacillus
Catenibacterium	Dietzia
Cellvibrio	Holdemania
Cryomorpha	Lachnobacterium
Cryptosporangium	Leptolyngbya
Cupriavidus	Microbacterium
Devosia	Pseudoramibacter_Eubacterium
Dyella	Rhizobium
Dysgonomonas	Saccharopolyspora
Emticicia	Scytonema
Epulopiscium	Selenomonas
Flexithrix	Skermanella
Fluviicola	Variovorax
Glaciecola
Gluconacetobacter
Halomicronema
Halomonas
HTCC
Hydrogenophaga
Hymenobacter
Hyphomicrobium
Hyphomonas
Jeotgalicoccus
Limnohabitans
Lysobacter
Mobiluncus
Modestobacter
Mycobacterium
Mycoplana
Nautella
Nitrospira
Opitutus
Oscillatoria
Paenibacillus
Pelomonas
Phaeospirillum
Phenylobacterium
Phormidium
Photobacterium
Planctomyces
Plesiocystis
Proteus
Providencia
Renibacterium
Rhodobacter
Rhodococcus
Rhodovulum
Roseivirga
Rubellimicrobium
Rubrivivax
Rubrobacter
Saccharothrix
Salinicoccus
Sarcina
Sediminicola
Slackia
Spirosoma
Sporomusa
Telmatospirillum
Thalassomonas
Thermomonas
Treponema
Vagococcus
Winogradskyella
Wohlfahrtiimonas
Yaniella

## Sheet: Table S3
28 genera are uniquely harbored in CD while 38 genera in HC.
CD	HC
Acidaminococcus	Abiotrophia
Afifella	Adlercreutzia
Alicycliphilus	Aerococcus
Amaricoccus	Anaerostipes
Anaerotruncus	Arsenicicoccus
Anoxybacillus	Azospirillum
Balneimonas	Blastococcus
Bdellovibrio	Blastomonas
Eikenella	Brachybacterium
Hydrogenophaga	Catonella
Luteimonas	Clavibacter
Marinilactibacillus	Cloacibacillus
Methylibium	Congregibacter
Microvirgula	Coprobacillus
Mycobacterium	Desemzia
Oceanicaulis	Dietzia
Paenibacillus	Gemmata
Peptococcus	Geobacillus
Planctomyces	Herbaspirillum
Polynucleobacter	Holdemania
Promicromonospora	Kaistobacter
Proteus	Kocuria
Pseudoxanthomonas	Kytococcus
Rhodobacter	Leptolyngbya
Rhodococcus	Methanobrevibacter
Slackia	Methylotenera
Thiobacillus	Microbacterium
Turicibacter	Propionibacterium
	Rhizobium
	Rhodoplanes
	Schlegelella
	Scytonema
	Selenomonas
	Serratia
	Skermanella
	Sphingopyxis
	Staphylococcus
	Tepidimonas

## Sheet: Table S4
34 genera are uniquely harbored in CD while 73 genera in ITB.
CD	ITB
Acidaminococcus	Aeromicrobium
Adlercreutzia	Alteromonas
Alicycliphilus	Arthrospira
Amaricoccus	Asticcacaulis
Anoxybacillus	Azorhizobium
Balneimonas	Blastococcus
Blastomonas	Brachybacterium
Bosea	Brevibacillus
Campylobacter	Burkholderia
Desulfotomaculum	CandidatusAquiluna
Dietzia	Catenibacterium
Eikenella	Caulobacter
Erythromicrobium	Cloacibacillus
Filifactor	Congregibacter
Gardnerella	Cryomorpha
Hydrogenophilus	Cryptosporangium
Lachnobacterium	Cupriavidus
Lentzea	Desemzia
Luteimonas	Dyella
Marinilactibacillus	Dysgonomonas
Microvirgula	Emticicia
Nocardioides	Epulopiscium
Oceanicaulis	Flexithrix
Peptococcus	Fluviicola
Polynucleobacter	Gemmata
Promicromonospora	Geobacillus
Pseudoramibacter_Eubacterium	Glaciecola
Pseudoxanthomonas	HTCC
Pyramidobacter	Halomicronema
Rhizobium	Halomonas
Steroidobacter	Hymenobacter
Turicibacter	Hyphomicrobium
Variovorax	Hyphomonas
Zoogloea	Jeotgalicoccus
	Kocuria
	Limnohabitans
	Lysobacter
	Methanobrevibacter
	Methylotenera
	Mobiluncus
	Mycoplana
	Nautella
	Nitrospira
	Opitutus
	Oscillatoria
	Phaeospirillum
	Phenylobacterium
	Phormidium
	Photobacterium
	Plesiocystis
	Providencia
	Renibacterium
	Rhodobacter
	Rhodoplanes
	Rhodovulum
	Roseivirga
	Rubellimicrobium
	Rubrivivax
	Rubrobacter
	Saccharothrix
	Salinicoccus
	Sarcina
	Spirosoma
	Sporomusa
	Telmatospirillum
	Thalassomonas
	Thermomonas
	Treponema
	Vagococcus
	Vogesella
	Winogradskyella
	Wohlfahrtiimonas
	Yaniella
